# Supplementary material
Source: Elsevier journal article supplement (https://www.sciencedirect.com/science/article/pii/S2531043720301537)
Supplement: mmc1 [file S2531043720301537:mmc1.docx]

**Online Supplementary Material to:**

**Rationale and Evidence on the use of Tocilizumab in COVID-19:**

**A Systematic Review**

Andrea Cortegiani1, Mariachiara Ippolito1, Massimiliano Greco2,3, Veronica Granone2,3, Alessandro Protti2,3, Cesare Gregoretti1,4, Antonino Giarratano1, Sharon Einav5, Maurizio Cecconi2,3

1Department of Surgical, Oncological and Oral Science (Di.Chir.On.S.), Section of Anaesthesia, Analgesia, Intensive Care and Emergency, Policlinico Paolo Giaccone, University of Palermo, Italy

2Department of Anesthesiology and Intensive Care, Humanitas Clinical and Research Center – IRCCS, Milan, Italy

3Department of Biomedical Science, Humanitas University, Milan, Italy

4Fondazione “Giglio”, Cefalù, Italy

5Intensive Care Unit of the Shaare Zedek Medical Medical Centre and Hebrew University Faculty of Medicine, Jerusalem, Israel

Corresponding author: Andrea Cortegiani; Department of Surgical, Oncological and Oral Science (Di.Chir.On.S). Section of Anaesthesia, Analgesia, Intensive Care and

Emergency. Policlinico Paolo Giaccone. University of Palermo, Italy.

Email: [andrea.cortegiani@unipa.it](mailto:andrea.cortegiani@unipa.it); Phone: +390916552700

**CONTENT**

**Page 3 - Table A.1. Characteristics of the ongoing studies**

**Page 20 - Table A.2. Risk of bias of single arm included studies**

**Page 21 - References**

| ID | Recruiting status | Study design | Country | Population  (n patients) | Intervention Group § | Comparison Group(s) | Primary Outcomes |
| --- | --- | --- | --- | --- | --- | --- | --- |
| NCT04310228 / ChiCTR2000030894 | Recruiting | Multicentre RCT | China | Patients with COVID-19 and high IL-6 (n=150) | Combination group (Favipiravir + Tocilizumab)  Favipiravir: oral 1600mg BID on the day1; from the day 2 to day 7, 600mg BID;  Tocilizumab: e.v. first dose of 4 ~ 8mg/kg (recommended dose 400mg).  Additional application (the same dose as before) is still febrile within 24 hours, with ≥ 12 hours interval between two doses. | Favipiravir group: oral 1600mg BID on day 1; from day 2 to day 7, 600mg BID;  Tocilizumab group  e.v. first dose of 4 ~ 8mg/kg (recommended dose 400mg).  Additional application (the same dose as before) is still febrile within 24 hours, with ≥ 12 hours interval between two doses. | Clinical cure rate |
| ChiCTR2000029765 | Recruiting | Multicentre RCT | China | Patients with COVID-19 pneumonia and high IL-6 (n=188) | Tocilizumab | Conventional therapy | Clinical cure rate |
| NCT04315480 | Active, not recruiting | Single-centre  Simon's Two-stages Optimal Design Trial | Italy | Patients with COVID-19  (n=38) | Tocilizumab i.v 8 mg/kg single administration | All the patients enrolled are treated with tocilizumab | Arrest in deterioration of pulmonary function or improving in pulmonary function at day 7 |
| NCT04306705 | Recruiting | Multicentre retrospective cohort study | China | Patients with COVID-19  (n=120) | Tocilizumab i.v. 8 mg/kg | Continuous Renal Replacement Therapy | Normalization of Fever and Oxygen Saturation at day 14 |
| NCT04335071 | Recruiting | Multicentre RCT | Switzerland | Patients with COVID-19 (n=100) | Tocilizumab i.v. 8 mg/kg single administration (up to a maximum of 800mg per dose). Second dose if no clinical improvement. | Placebo | ICU admission at day 7, intubation at day 14, mortality at day 28 |
| NCT04345445 | Not yet recruiting | Single centre crossover randomized trial | Malaysia | Patients with COVID-19  (n=310) | Tocilizumab i.v. 8 mg/kg single administration | Methylprednisolone i.v. 120mg/day for 3 days | Need of mechanical ventilation and mean days of ventilation through study completion and at 6 months |
| NCT04333914 | Recruiting | Multicentre RCT | France | COVID-19 pneumonia and advanced or metastatic hematological or solid tumor  (273) | Tocilizumab (Only if moderate-severe)  400 mg i.v intravenously, single infusion at Day 1. | Chloroquine analogue (GNS651)  If mild/asymptomatic: 200mg bid loading dose for 2 days then, 200 qd orally for 14 consecutive days.  If moderate-severe :200mg bid loading dose for 2 days then, 200 qd/day orally, per os, for 14 consecutive days.  Nivolumab:  Only if mild/asymptomatic: 0.3mg/Kg, intravenously, single infusion at Day 1.  Standard of care group:  Conventional therapy | Survival rate at day 28 |
| NCT04332094 | Recruiting | Multicentre RCT | Spain | COVID-19 pneumonia  (n=276) | Tocilizumab  162 mg sc x 2 doses + tocilizumab 162mg sc x 2 doses at 12 hours (day 1)  Drug: Hydroxychloroquine  400 mg / 12h v.o. day 1 followed by 200 mg / 12h v.o. for 6 days (7 days in total)  Azithromycin oral 500 mg / day for 3 days | Hydroxychloroquine oral  400 mg / 12h day 1 followed by 200 mg / 12h v.o. for 6 days (7 days in total)  Azithromycin oral 500 mg / day v.o. for 3 days | In-hospital mortality and need for mechanical ventilation in the Intensive Care Unit at day 14 and at dimission |
| NCT04330638 | Recruiting | Multicentre RCT | Belgium | Patients with COVID-19 (n=342) | Anakinra-Tocilizumab group:  Anakinra s.c 100 mg/day for 28 days or until hospital discharge  Tocilizumab e.v. 8 mg/kg (up to a maximum of 800mg per dose), single administration  Tocilizumab group:  Tocilizumab e.v. 8 mg/kg (up to a maximum of 800mg per dose), single administration | Anakinra-Siltuximab group:  Anakinra s.c 100 mg/day for 28 days or until hospital discharge  Siltuximab e.v. 11 mg/kg, single administration  Siltuximab group:  Siltuximab e.v. 11 mg/kg, single administration  Anakinra group:  Anakinra s.c 100 mg/day for 28 days or until hospital discharge  Usual Care group:  Conventional therapy | Time to clinical Improvement |
| NCT04332913 | Recruiting | Single centre prospective observational clinical study | Italy | Hospitalized patients with COVID-19 with high level of IL-6  (n=30) | Tocilizumab | NA | Fever disappearance and return to normal SpO2 at day 14 |
| NCT04339712 | Recruiting | Multicentre non-randomized clinical trial | Greece | Patients with COVID-19 with MAS or immune dysregulation  (n=40) | Tocilizumab  If immune dysregulation: tocilizumab i.v. 8mg/kg (up to a maximum of 800mg) single administration. | If MAS: anakinra i.v. 200mg TID for 7 days. ( if kidney disfunction 100mg TID for 15 days) | Change of SOFA score, improvement of lung involvement and increase of pO2/FiO2 ratio at day 8 |
| NCT04335305 | Recruiting | Multicentre RCT | Spain | Patients with COVID-19 and hyperinflammatory status (n=24) | Tocilizumab 8 mg/kg i.v. (up to 800 mg per dose) over 60 minutes single dose  Plus  Pembrolizumab (MK3475) 200 mg i.v. over 30 minutes single dose.  Additional same dose of TCZ if no improvement in 12h. If SpO2 ≤ 94% on room air additional dose of pembrolizumab (MK-3475) after 3 weeks and/or an additional dose of tocilizumab after 4 weeks at physician's discretion | Standard care | Percentage of patients with normalization of SpO2 ≥96% at day 14 |
| NCT04346355 | Recruiting | Multicentre RCT | Italy | Patients with COVID-19 (n=398) | Tocilizumab within 8 hours from entering the study 8 mg/kg i.v. (up to 800 mg) with repetition after 12 hours in case of worsening | Standard care.  In case of worsening, TCZ 8 mg/kg i.v. (up to 800 mg) with repetition of the same dosage after 12 hours | ICU admission with invasive mechanical ventilation or death from any cause or clinical worsening at day 14 |
| NCT04320615 | Active, not recruiting | Multicentre RCT | USA, Canada, Denmark, France, Germany, Italy, Netherlands, Spain, UK | Patients with COVID-19 (n=450) | TCZ i.v. 8 mg/kg (up to 800 mg). Up to 1 additional dose if clinical worsening or no improvement | Placebo | Clinical Status Assessed Using a 7-Category Ordinal Scale at day 28 |
| NCT04331808 | Active, not recruiting | Single-centre RCT | France | Patients with COVID-19 (n=228) | Tocilizumab 8mg/kg at day 1 and if no response second injection at day 3 | Standard care | Survival without needs of ventilator utilization at day 14, WHO progression scale <=5 at day 4, cumulative incidence of successful tracheal extubation (defined as duration extubation > 48h) at day 14, decrease of WHO score of at least 1 point at day 4 |
| NCT04347031 | Active, not recruiting | Single-centre randomized trial | Russian Federation | COVID-19 pneumonia (n=320) | Combination: Hydroxychloroquine + azithromycin + Tocilizumab (dosage NA)  Day 1: 800 mg of HCQ (2 tablets 200 mg X 2)  Day 2 to 7: 400 mg of HCQ (1 tablet 200 mg X 2) per day  Combination: Mefloquine + azithromycin + Tocilizumab (dosage NA)  Day 1: 750 mg of mefloquine per day, (tablet 250 mg X 3)   - Day 2: 500 mg of mefloquine, (tablets 250 mg X 2) - Day 3 to 7: 250 mg of mefloquine | Hydroxychloroquine  Day 1: 800 mg of HCQ (2 tablets 200 mg X 2)  Day 2 to 7: 400 mg of HCQ (1 tablet 200 mg X 2) per day  Mefloquine  Day 1: 750 mg of mefloquine per day, (tablet 250 mg X 3)   - Day 2: 500 mg of mefloquine, (tablets 250 mg X 2)   Day 3 to 7: 250 mg of mefloquine. | Respiratory failure requiring ICU care at 3 months; clinical recovery at 3 months;  mortality at 3 months |
| ChiCTR2000030196 | Not yet recruiting | Multicentre single-arm clinical trial | China | COVID-19 pneumonia with high IL-6 (n=60) | Tocilizumab | All the patients enrolled are treated with tocilizumab | Relieve of cytokine release syndrome |
| NCT04349410 | Enrolling by invitation | Single-centre RCT | USA | Patients with COVID-19  (n=500) | Tocilizumab 8mg/kg IV (up to 800 mg). If no clinical improvement, three additional doses at q 8-hour intervals, for a total of 4-doses maximum.  Any patient demonstrating cytokine release syndrome will automatically receive this treatment arm. | Active comparators.  Drug: Hydroxychloroquine (200mg X3/die per 10 days) + Azithromycin (500mg i.v. day1, then 250mg i.v. days 2 to 5).  Drug: Hydroxychloroquine (200mg X3/die per 10 days)+ Doxycycline (100mg i.v.X2)  Drug: Hydroxychloroquine(200mg X3/die per 10 days)+ Clindamycin(p.o. 150-450mgX4 or 4800mg i.v./day for 7 days)  Drug: Hydroxychloroquine(200mg X3/die per 10 days)+ Clindamycin(p.o. 150-450mgX4 or 4800mg i.v./day for 7 days) + Primaquine (200mg day1)  Drug: Hydroxychloroquine (800mg + 400mg after 8h, then 400mg day 2 and day3), Clindamycin(p.o. 150-450mgX4 or 4800mg i.v./day for 7 days)+ Primaquine(200mg day1)  Drug: Remdesivir (200 mg i.v. day 1, then 100 mg/day for 10days)  Drug: Methylprednisolone (80 mg i.v. X2 per 7days)  Drug: Interferon-Alpha2B X2  Drug: Losartan (25mg/die)  Drug: Convalescent Serum drom COVID-19 survivors | Improvement in FMTVDM (The Fleming Method for Tissue and Vascular Differentiation and Metabolism ) measurement with nuclear imaging at 72h |
| NCT04346693 | Active, not recruiting | Single-centre randomized trial | Russia | Hospitalized patients with COVID-19  (n=320) | Hydroxychloroquine + azithromycin + / - tocilizumab + dalargin  HCQ 400 mg twice per day for 1-2 days then 200 mg twice daily per six days.  TCZ 400 mg i.v.; if insufficient effect, administration is repeated after 12h (simultaneously no more than 800 mg)  AZ 500mg on day 1, then 250mg/day for the next four days  Dalargin 10 mg i.v. daily symptoms remission And/or  i.m injection of Dalargin 1 mg/day for 10 days | Hydroxychloroquine + azithromycin + / - tocilizumab + dalargin  HCQ 400 mg twice per day for 1-2 days then 200 mg twice daily per six days.  TCZ 400 mg i.v.; if insufficient effect, administration is repeated after 12h (simultaneously no more than 800 mg)  AZ 500mg on day 1, then 250mg/day for the next four days  Dalargin 10 mg i.v. daily symptoms remission And/or  i.m injection of Dalargin 1 mg/day for 10 days | Change of PCR viral load at day0, after 96 hours and at day10; ARDS at day 10; Hospitalization at day 10;  Mortality at day 30 and day 90; Clinical status at day 10 |
| NCT02735707 | Recruiting | Multicentre RCT | Australia, Belgium, Canada, Croatia, Germany, Hungary, Ireland, Netherlands, New Zealand, Portugal, Romania, Spain, UK | ICU patients with suspected CAP or COVID-19  (n=7100) | Tocilizumab single 8 mg/kg i.v. (up to 800mg). | No intervention or  Drug: Hydrocortisone  50mg i.v. every 6 hours for up to 7 days or while the patient is in septic shock; or 100mg every 6 hours for up to 7 days.  Drug: Ceftriaxone  Drug: Moxifloxacin or Levofloxacin  Drug: Piperacillin-tazobactam  Drug: Ceftaroline  Drug: Amoxicillin-clavulanate  Drug: Macrolide administered for 3-5 days  Drug: Macrolide administered for up to 14 days  (Duration and dose of antibiotics determined by the treating clinician and local practice)  Drug: Five-days oseltamivir  Drug: Ten-days oseltamivir enterally twice daily for 5 days or until hospital discharge.  Drug: Lopinavir/ritonavir 400/100mg enterally, or 5ml 80/20mg per mL solution suspension via gastric tube, every 12 hours for a minimum of 5 days  Drug: Hydroxychloroquine 800mg administered enterally every 6 hours until 2 doses, then 400mg every 12 hours for 12 doses or ICU discharge.  Drug: Hydroxychloroquine + lopinavir/ritonavir (same dosage as above)  Drug: Interferon-β1a once daily for 6 days or until ICU discharge;  Anakinra 300mg as a bolus followed by maintenance doses of 100mg every 6 hours.  Drug: Sarilumab single dose of 400mg | All-cause mortality at day 90;  Days alive and outside of ICU at day 21 |
| NCT04374539 | Recruiting | Multicentre open label RCT | Spain | Patients with COVID-19 admitted in ICU with invasive mechanical ventilation  (n=116) | Plasma exchanges with 5% human albumin and fresh frozen plasma in patients with quick <50% or only with 5% albumin in patients with quick of 50% or more.  Polyclonal immunoglobulin at a dose of 100 mg / kg ev after each plasma exchange.  And  Kaletra: lopinavir/ritonavir: 2c/12h 7 days   - Hydroxychloroquine sulfate 400 mg/12h the first day followed by 200 mg /12h for 4 days - Azithromycin 500 mg first day, followed by 250 mg /d 4 days (oral or EV) - Tocilizumab 400 mg (weight <75Kg) or 600 mg (weight ≥ 75 Kg) - Methylprednisolone 250 mg EV three days and 30 mg/d another 3 days - Anakinra 200mg/ 12h first day, 200mg / 24h two more days - Clexane 40-60 mg/d | lopinavir/ritonavir: 2c/12h 7 days   - Hydroxychloroquine sulfate 400 mg/12h the first day followed by 200 mg /12h for 4 days - Azithromycin 500 mg first day, followed by 250 mg /d 4 days (oral or EV) - Tocilizumab 400 mg (weight <75Kg) or 600 mg (weight ≥ 75 Kg) - Methylprednisolone 250 mg EV three days and 30 mg/d another 3 days - Anakinra 200mg/ 12h first day, 200mg / 24h two more days - Clexane 40-60 mg/d | Mortality at day 28 |
| NCT04380818 | Recruiting | Multicentre nonrandomized clinical trial | Spain | Moderate to severe COVID-19 with high IL6, PCR or D-dimer (n=106) | Radiation: Low-dose radiotherapy  Drug: Hydroxychloroquine Sulfate  200 mg/12h for 5 days  Drug: Ritonavir/lopinavir  400/100 mg/12h for 7-10 days  Drug: Tocilizumab  600 mg/day for 1-2 doses  Drug: Azithromycin  500 mg/24h for 3 days  Drug: Corticosteroid  (methylprednisolone/dexamethasone/prednisone)  Drug: Low molecular weight heparin Device: Oxygen supply | Drug: Hydroxychloroquine Sulfate  200 mg/12h for 5 days  Drug: Ritonavir/lopinavir  400/100 mg/12h for 7-10 days  Drug: Tocilizumab  600 mg/day for 1-2 doses  Drug: Azithromycin  500 mg/24h for 3 days  Drug: Corticosteroid  (methylprednisolone/dexamethasone/prednisone)  Drug: Low molecular weight heparin  Device: Oxygen supply  Oxygen | Change in P/F at day 2.  In cases of impossibility the SaFiO2 will be determined |
| NCT04381936 | Recruiting | Multicentre RCT | UK | Hospitalized patients with suspected or confirmed COVID-19  (n=12000) | Eligible patients will be randomly allocated between the available 5 treatment arms:  Tocilizumab  Or Azithromycin  Or Lopinavir-Ritonavir  Or Hydroxychloroquine  Or dexamethasone (in pregnancy or breastfeeding women, prednisolone)  Simultaneously, eligible patients will be randomly allocated between convalescent plasma or no additional treatment.  Convalescent plasma  Single unit of ABO compatible (275mls +/- 75 mls) per day on day 1 and day 2 | One of the five treatment arm without plasma. | All-cause mortality at day 28 |
| NCT04322773 | Recruiting | Multicentre open-Label, Sequential and Cluster Randomized Trial | Denmark | Patients with confirmed COVID-19, oxygen therapy  (n=200) | Tocilizumab iv  single dose 400 mg intravenously  Or 2 x 162 mg subcutaneously | Sarilumab 1 x 200 mg subcutaneously or standard care | Time to independence from supplementary oxygen therapy |
| NCT04361552 | Recruiting | Single-centre open-Labeled, Randomized Trial | USA | Hospitalized patients with covid-19  (n=180) | Tocilizumab i.v | Standard care | Length of invasive mechanical ventilation (MV) |
| NCT04403685 | Recruiting | Multi-centre Randomized Clinical Trial | Brasil | Hospitalized patients with COVID-19 under oxygen therapy or MV and high inflammatory markers  (n=150) | Tocilizumab  Single-dose infusion of 8 mg/kg. Maximum dose of 800 mg. | Standard care | Clinical status at day 15 |
| NCT04361032 | Not yet recruiting | Multicentre, Comparative, Randomized Study | Tunisia | ICU patients with confirmed COVID-19  (n=260) | Tocilizumab (LOC) (8mg/ kg per day) (1 injection per infusion). Only on the day1 | Deferoxamine 500 mg i.v. | Mortality rate at day 90 |
| NCT04377503 | Not yet recruiting | Single-centre prospective randomized controlled study | Brasil | Patients with confirmed COVID-19 and high IL-6 or inflammatory markers  (n=40) | Tocilizumab 8 mg/kg. The dose will be repeated after 12 hours. | Methylprednisolone  1.5 mg / kg / day divided into 2 daily doses for 7 days, then 1 mg / kg / day for another 7 days. Finally 0.5 mg / kg / day until 21 days of use | Patient clinical status at day 15;  A seven-category ordinal scale consisting of: 1) Death; 2) Hospitalized, on invasive mechanical ventilation or extracorporeal membrane oxygenation (ECMO); 3) Hospitalized, on non-invasive ventilation or high flow oxygen devices; 4) Hospitalized, requiring supplemental oxygen; 5) Hospitalized, not requiring supplemental oxygen - requiring ongoing medical care (COVID-19 related or otherwise); 6) Hospitalized, not requiring supplemental oxygen - no longer requires ongoing medical care; 7) Not hospitalized, limitation on activities and/or requiring home oxygen; 8) Not hospitalized, no limitations on activities. |
| NCT04370834 | Not yet recruiting | Single-centre single arm interventional study | USA | Hospitalized patients with cancer and respiratory complications related to COVID-19 disease  (n=200) | Tocilizumab i.v.  Patients with stable disease, incomplete benefit, or recurrence of symptoms may receive a second dose | No comparison | Frequency of response;  Length of time from level of care to step down level of care  Survival at day 60 |
| NCT04363736 | Recruiting | Multicentre open-Label, Randomized, Study | USA | Hospitalized patients with confirmed severe or moderate COVID-19  (n=100) | TCZ 4 mg/kg | TCZ 8 mg/kg | Serum Concentration of interleukin-6 (IL-6), Soluble Interleukin-6 Receptor (sIL-6R), ferritin, C-reactive Protein (CRP), at predefined intervals by Day 28 |
| NCT04372186 | Recruiting | Multicentre Randomized, Double-Blind, Placebo-Controlled, Study | USA | Hospitalized patients with confirmed COVID-19  (n=379) | TCZ 8 mg/kg, with a maximum dose of 800 mg. Up to one additional dose may be given. | IV placebo matched to TCZ. Up to one additional dose may be given. | Cumulative Proportion of Participants Requiring Mechanical Ventilation by Day 28 |
| NCT04377750 | Recruiting | Multicentre Open Label RCT | Israel | Patients with confirmed COVID-19  (n=500) | Tocilizumab 8 mg/kg (up to total dose of 800 mg) | Placebo: Intravenous administration of 100 ml of normal saline | Survival at day 30. |
| NCT04363853 | Recruiting | Single-centre single arm, open-label, prospective, blinded, clinical trial | Mexico | Patients with severe or critical COVID-19  (n=200) | Tocilizumab | No comparison | At 24h, 48h, 72h, 7days and 14days: Control of hemoglobin, hematocrit, platelets, and leukocytes levels, glucose, uric acid, cholesterol, urea, triglycerides, and creatinine, blood gas  At 24hours, 7days and 14days: thorax radiography |
| NCT04377659 | Recruiting | Single-centre single arm clinical trial | USA | Hospitalized patients with severe COVID-19  (n=40) | Participants will receive Tocilizumab 8 mg/kg i.v. at enrollment. Dose will be capped at 800 mg per infusion. If there is no improvement or toxicity, a second dose can be given 24 hrs to 5 days later. | No comparison | Progression of respiratory failure or death at day 14 |
| NCT04331795 | Recruiting | Single-centre non-randomized clinical trial | USA | Hospitalized patients with confirmed COVID-19  (n=50) | Tocilizumab 200mg  Second dose is provisioned if:  Increasing supplemental oxygen requirement or Tmax higher than baseline in the 24h following initial tocilizumab administration AND CRP decrease is < 25% at 24 hours following tocilizumab administration and CRP > 40mg/L | Tocilizumab 80mg  Second dose is provisioned if:  Increasing supplemental oxygen requirement or Tmax higher than baseline in the 24h following initial tocilizumab administration AND  CRP decrease is < 25% at 24 hours following tocilizumab administration and CRP > 40mg/L | Clinical response at 24h; absence of Tmax greater than or equal to 38ºC in the 24-hour period following tocilizumab administration; CRP normalization rate; time to CRP normalization. |
| NCT04359667 | Recruiting | Single-centre prospective observational Study | Croatia | Patients with severe COVID-19 pneumonia (and/or ARDS)  (n=30) | Tocilizumab  1 - 8 mg/ kg (maximal 800 mg); can be repeated once more after 12 hours, per clinician`s assessment | No comparison | Serum IL-6 and soluble IL-6 receptor at 24h, 48h, day 7 and day 14 |
| NCT04356937 | Not yet recruiting | Single-centre prospective placebo-controlled, randomized controlled trial | USA | ICU patients with confirmed COVID-19 and inflammatory markers  (n=300) | Tocilizumab 8 mg/kg (maximum 800 mg) | Placebo | Proportion of patients that require mechanical ventilation at day 28 |
| NCT04394182 | Recruiting | Multicentre prospective single arm study | Spain | Patients with confirmed COVID-19 and inflammatory markers  (n=15) | Ultra-Low-dose radiotherapy  Oxygen Therapy with Nasal Cannula or Ventimask  Lopinavir/ritonavir  100/400 mg/12h; 7-10 days  Hydroxychloroquine  200 mg/12h  Azithromycin  500 mg/24h, 3 days  Piperacillin/tazobactam  4 g / 0.5 g administered every 6-8 hours for 5-14 days.  Low molecular weight heparin  prophylactic doses  Urbason 250mg x 3  Tocilizumab  600mg single dose | No comparison | Oxygen therapy de-escalation and SapO2 at day 2 |
| NCT04423042 | Not yet recruiting | Single-centre nested cohort study | Canada | Hospitalized patients with suspected or confirmed COVID-19 and hyperinflammation  (n=30) | Tocilizumab 8 mg/kg i.v. (up to 800 mg9 with possible repetition within 28 hours but after 12 hours, based on clinical judgment | No intervention | All-cause mortality at day 30 |
| NCT04409262 | Recruiting | Multicentre RCT | USA, Brazil | Hospitalized patients with confirmed COVID-19 (n=450) | Remdesivir loading dose followed by TCZ on day 1, and a once daily remdesivir from day 2 to 10 | Remdesivir loading dose followed by one infusion of placebo on day 1, and a once daily remdesivir from day 2 to 10 | 7-Category Ordinal Scale of Clinical Status on Day 28 |
| NCT04412291 | Not yet recruiting | Single-centre RCT | Sweden | Hospitalized patients with confirmed COVID-19  (n=120) | Tocilizumab 8mg/kg single infusion iv (up to 800 mg), second dose if no clinical response after 2 days.  Anakinra 400mg per day (divided in 4 doses of 100 mg iv every 6 hours) for 7 days | Standard care | Time to recovery |
| NCT04424056 | Not yet recruiting | Single-centre RCT | France | Hospitalized patients with confirmed COVID-19  (n=216) | Tocilizumab +/- Ruxolitinib  or  Anakinra +/- Ruxolitinib | Standard care | Ventilation free days at day 28 |
| NCT04412772 | Recruiting | Single-centre RCT | USA | Hospitalized patients with COVID-19 and hyperinflammation status  (n=300) | TCZ 8 mg/kg (up to 800 mg). Up to 1 additional dose if clinical worsening | Placebo | Clinical status (on a 7-point ordinal scale) at day 28 |
| NCT04435717 | Recruiting | Single-centre RCT | Spain | Hospitalized patients with mild-moderate COVID-19  (n=78) | TCZ 8 mg/kg (up to 800 mg) single dose or TCZ 8 mg/kg in two doses at 0 and 12 hours (up to 800 mg per dose) | Standard care | Change in IL-12 values in from the start of treatment (D0) to days 1 and 3 |
| ChiCTR2000033705 | Recruiting complete | Single-centre nonrandomized observational study | China | Patients with COVID-19 and high levels of IL-6  (n=61) | Tocilizumab | Standard care | Clinical status and laboratory examinations |

**Table A.1. Characteristics of the ongoing studies**

Data were retrieved from the Chinese Clinical Trial Registry and Clinicatrial.gov, accessed on 20th June 2020.

§ In the case of multiple active comparator, the table shows Tocilizumab group as intervention and the others as comparisons.

COVID-19: coronavirus disease 2019; BID: twice a day; IMV: invasive mechanical ventilation; RCT: randomized controlled trial

| **Author** | **Case Control / Cohort** | **Selection** | | | | **Comparability** | **Outcome/Exposure** | | | **Score** |
| --- | --- | --- | --- | --- | --- | --- | --- | --- | --- | --- |
| 1 | 2 | 3 | 4 | 1 2 | 1 | 2 | 3 |
| Alattar et al.1 | Cohort | * |  | * | * |  | * | * | * | 6 |
| Fomina et al. 2 | Cohort | * |  |  | * |  |  | * | * | 4 |
| Gorgolas et al. 3 | Cohort | * |  | * | * |  | * | * | * | 6 |
| Luo et al. 4 | Cohort | * |  | * | * |  | * | * | * | 6 |
| Morena et al. 5 | Cohort | * |  | * | * |  | * | * | * | 6 |
| Perrone et al. 6 | Cohort | * |  | * | * |  | * | * |  | 5 |
| Petrak et al. 7 | Cohort | * |  | * | * |  | * | * | * | 6 |
| Price et al. 8 | Cohort | * |  | * | * |  | * | * | * | 6 |
| Rimland et al. 9 | Cohort | * |  | * | * |  | * | * | * | 6 |
| Sanchez Montalva et al. 10 | Cohort | * |  | * | * |  | * | * | * | 6 |
| Sciascia et al. 11 | Cohort | * |  | * | * |  | * | * | * | 6 |
| Toniati et al. 12 | Cohort | * |  | * | * |  | * | * | * | 6 |
| Xu et al. 13 | Cohort | * |  | * | * |  | * | * | * | 6 |

**Table A.2. Risk of bias of single arm included studies**

The table shows the results of Newcastle-Ottawa-scale (NOS) 14,<sup>14</sup><sup>14</sup><sup>14</sup>[14][13][12][11][10] performed for single-arm included studies. A ‘good’ quality score required three or four stars in selection, one or two stars in comparability, and two or three stars in outcomes. A ‘fair’ quality score required two stars in selection, one or two stars in comparability, and two or three stars in outcomes. A ‘poor’ quality score reflected no or one star(s) in selection, or no stars in comparability, or no or one star(s) in outcomes

**REFERENCES**

1. Alattar R, Ibrahim TBH, Shaar SH, Abdalla S, Shukri K, Daghfal JN, et al. Tocilizumab for the treatment of severe coronavirus disease 2019. *J Med Virol*. 2020. doi:10.1002/jmv.25964

2. Fomina DS, Lysenko M, Beloglazova IP, Mutinova ZY, Poteshkina NG, Samsonova IV, et al. Temporal clinical and laboratory response to interleukin-6 receptor blockade with Tocilizumab in 89 hospitalized patients with COVID-19 pneumonia. *medRxiv*. 2020. doi:10.1101/2020.06.12.20122374

3. Gorgolas M, Cabello A, Perez LP, Alvarez FV, Alvarez BA, Rodriguez Nieto MJ, et al. Compassionate Use of Tocilizumab in Severe SARS-CoV2 Pneumonia. When late administration is too late. *medRxiv*. 2020. doi:10.1101/2020.06.13.20130088

4. Luo P, Liu Y, Qiu L, Liu X, Liu D, Li J. Tocilizumab treatment in COVID-19: A single center experience. *J Med Virol*. 2020. doi:10.1002/jmv.25801

5. Morena V, Milazzo L, Oreni L, Bestetti G, Fossali T, Bassoli C et al. Off-label use of tocilizumab for the treatment of SARS-CoV-2 pneumonia in Milan, Italy. *Eur J Intern Med*. 2020;**76**:36-42. doi:10.1016/j.ejim.2020.05.011

6. Perrone F, Piccirillo MC, Ascierto PA, Salvarani C, Parrella R, Marata AM et al. Tocilizumab for patients with COVID-19 pneumonia. The TOCIVID-19 phase 2 trial. *medRxiv*. 2020. doi:10.1101/2020.06.01.20119149

7. Petrak R, Skorodin N, Hise N Van, et al. Tocilizumab as a Therapeutic Agent for Critically Ill Patients Infected with SARS-CoV-2. *medRxiv*. 2020. doi:10.1101/2020.06.05.20122622

8. Price CC, Altice FL, Shyr Y, Koff A, Pischel L, Goshua G et al. Tocilizumab treatment for Cytokine Release Syndrome in hospitalized COVID-19 patients: survival and clinical outcomes. *Chest*. 2020. doi:10.1016/j.chest.2020.06.006

9. Rimland CA, Morgan CE, Bell GJ, Kim MK, Hendrick T, Marx A et al. Clinical characteristics and early outcomes in patients with COVID-19 treated with tocilizumab at a United States academic center. *medRxiv*. 2020. doi:10.1101/2020.05.13.20100404

10. Sanchez-Montalva A, Selares-Nadal J, Espinosa-Pereiro J, Fernandez-Hidalgo N, Perez-Hoyos S, Salvador F, et al. Early outcomes of tocilizumab in adults hospitalized with severe COVID19. An initial report from the Vall dHebron COVID19 prospective cohort study. *medRxiv*. 2020. doi:10.1101/2020.05.07.20094599

11. Sciascia S, Aprà F, Baffa A, Baldovino S, Boaro D, Boero R, et al. Pilot prospective open, single-arm multicentre study on off-label use of tocilizumab in patients with severe COVID-19. *Clin Exp Rheumatol*. 2020;**38**:529‐532.

12. Toniati P, Piva S, Cattalini M, Garrafa E, Regola F, Castelli F, et al. Tocilizumab for the treatment of severe COVID-19 pneumonia with hyperinflammatory syndrome and acute respiratory failure: A single center study of 100 patients in Brescia, Italy. *Autoimmun Rev*. 2020;**19**:102568. doi:10.1016/j.autrev.2020.102568

13. Xu X, Han M, Li T, Sun W, Wang D, Fu B, et al. Effective treatment of severe COVID-19 patients with tocilizumab. *Proc Natl Acad Sci*. April 2020. doi:10.1073/pnas.2005615117

14. Stang A. Critical evaluation of the Newcastle-Ottawa scale for the assessment of the quality of nonrandomized studies in meta-analyses. *Eur J Epidemiol*. 2010;**25**:603-605. doi:10.1007/s10654-010-9491-z
